# Supplementary material for: Redox characteristics variations in the cation-ordered perovskite oxides BaLnMn2O5+δ(Ln = Y, Gd, Nd, and La) and Ca2Al1−xGaxMnO5+δ(0 ≤ x ≤ 1)
Source: Royal Society of Chemistry journal article supplement (doi:10.1039/c4dt03863k), 2015-01-01
Supplement: c4dt03863k1.pdf [file c4dt03863k1.pdf]

Electronic Supplementary Information (ESI)

**Redox characteristics variations in the cation-ordered  
perovskite oxides  $\text{BaLnMn}_2\text{O}_{5+\delta}$  ( $\text{Ln} = \text{Y}, \text{Gd}, \text{Nd}, \text{and La}$ )  
and  $\text{Ca}_2\text{Al}_{1-x}\text{Ga}_x\text{MnO}_{5+\delta}$  ( $0 \leq x \leq 1$ )**

Teruki Motohashi,\* Makoto Kimura, Takeru Inayoshi, Taku Ueda, Yuji Masubuchi, and  
Shinichi Kikkawa

*Faculty of Engineering, Hokkaido University, N13, W8, Kita-ku, Sapporo Hokkaido 060-8628,  
Japan.*

CONTENTS

- (1) XRD patterns for as-synthesized  $\text{BaLnMn}_2\text{O}_{5+\delta}$  with  $\text{Ln} = \text{Y}, \text{Gd}, \text{Nd}, \text{and La}$ .
- (2) SEM images of the  $\text{BaLnMn}_2\text{O}_{5+\delta}$  products.
- (3) XRD patterns for as-synthesized  $\text{Ca}_2\text{Al}_{1-x}\text{Ga}_x\text{MnO}_{5+\delta}$  with  $x = 0, 0.1, 0.3, 0.5,$  and 1.
- (4) Plots of the orthorhombic  $a$ -,  $b$ -, and  $c$ -axis lengths for  $\text{Ca}_2\text{Al}_{1-x}\text{Ga}_x\text{MnO}_{5+\delta}$  with respect to the Ga content ( $x$ ).
- (5) SEM images of the  $\text{Ca}_2\text{Al}_{1-x}\text{Ga}_x\text{MnO}_{5+\delta}$  products.
- (6) XRD patterns for the oxygenated  $\text{Ca}_2\text{Al}_{1-x}\text{Ga}_x\text{MnO}_{5+\delta}$  products.

\*Corresponding Author. Faculty of Engineering, Hokkaido University, N13, W8, Kita-ku, Sapporo Hokkaido 060-8628, Japan. E-mail: t-mot@eng.hokudai.ac.jp; Tel: +81-(0)11-706-6741; Fax: +81-(0)11-706-6740.

(1) XRD patterns for as-synthesized  $\text{BaLnMn}_2\text{O}_{5+\delta}$  with  $\text{Ln} = \text{Y, Gd, Nd, and La}$ .

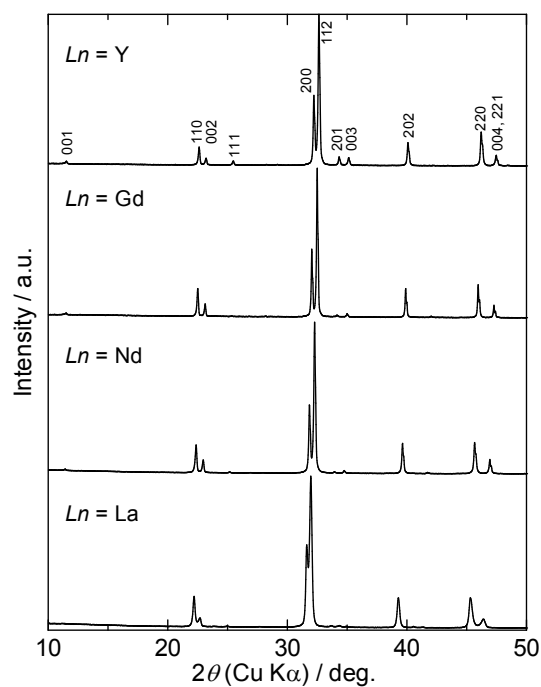

Fig. S1. X-ray powder diffraction patterns for the as-synthesized  $\text{BaLnMn}_2\text{O}_{5+\delta}$  products with  $\text{Ln} = \text{Y, Gd, Nd, and La}$ .

(2) SEM images of the  $\text{BaLnMn}_2\text{O}_{5+\delta}$  products.

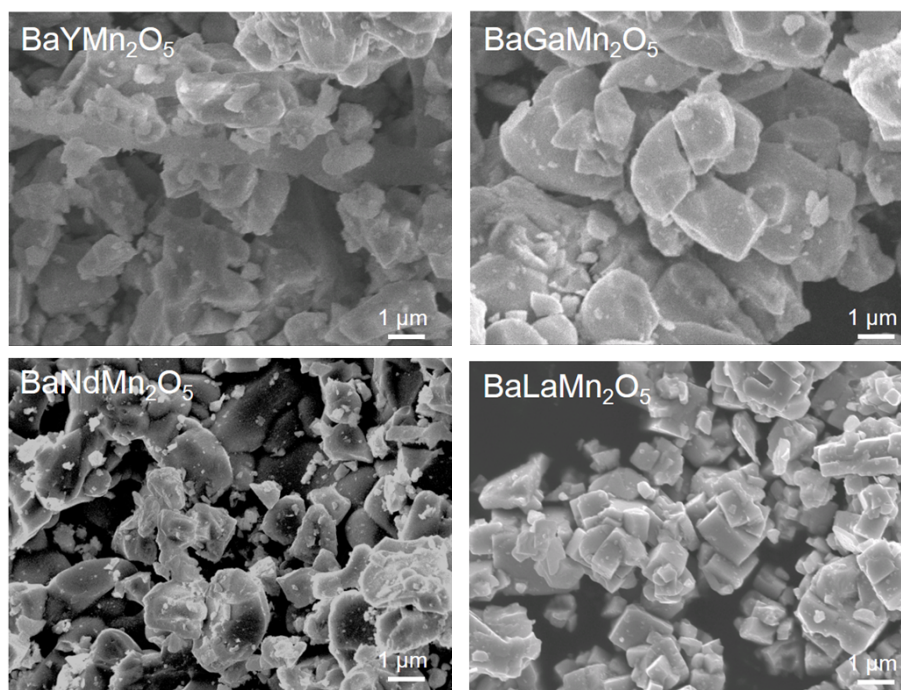

Fig. S2. SEM images of the  $\text{BaLnMn}_2\text{O}_{5+\delta}$  products: upper left,  $\text{Ln} = \text{Y}$ ; upper right,  $\text{Ln} = \text{Gd}$ ; lower left,  $\text{Ln} = \text{Nd}$ ; lower right,  $\text{Ln} = \text{La}$ .

(3) XRD patterns for as-synthesized  $\text{Ca}_2\text{Al}_{1-x}\text{Ga}_x\text{MnO}_{5+\delta}$  with  $x = 0, 0.1, 0.3, 0.5,$  and 1.

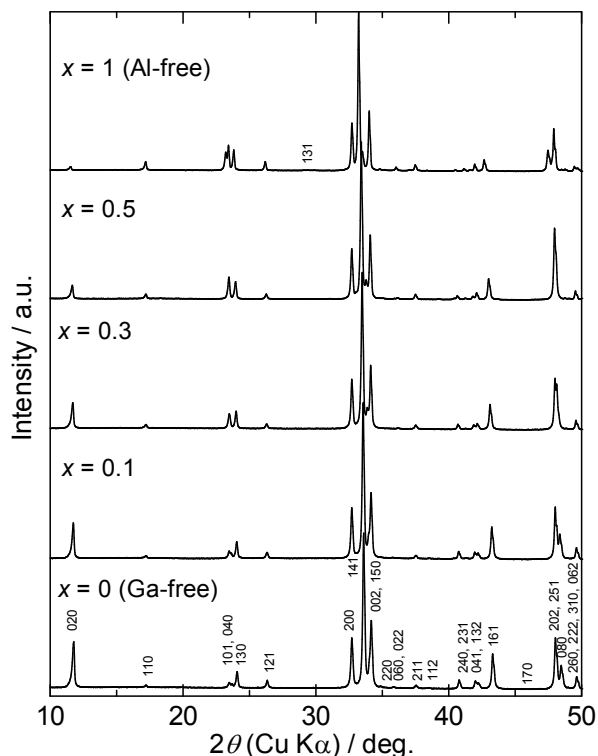

Fig. S3. X-ray powder diffraction patterns for the as-synthesized  $\text{Ca}_2\text{Al}_{1-x}\text{Ga}_x\text{MnO}_{5+\delta}$  products with  $x = 0, 0.1, 0.3, 0.5,$  and 1.

The  $\text{Ca}_2\text{Al}_{1-x}\text{Ga}_x\text{MnO}_{5+\delta}$  system was previously investigated by Antipov and coworkers.<sup>22-25</sup> They focused on a detailed structural feature regarding the ordering pattern of the two mirror-related tetrahedral (Al,Ga) $\text{O}_4$  chains, arbitrarily called “L” and “R”. The  $\text{Ca}_2\text{GaMnO}_{5+\delta}$  ( $x = 1$ ) end member is found to contain alternate stacking of L/R-chain layers with partial intermixing of the L/R chains, resulting in a primitive unit cell (space group  $Pcmm$ ).<sup>24</sup> A decrease in the Ga content ( $x$ ) leads to disrupted L/R-chain ordering, and eventually a complete phase transformation at  $x < 0.5$ , where the crystal lattice is described with a body-centered unit cell (space group  $Ibm2$ ). For our sample series, the 131 diffraction peak ( $2\theta \approx 29^\circ$ ), which can be used as an indicator of the L/R-chain ordering, is visible for  $x = 1$  and absent for  $x = 0$ , in agreement with the report of Antipov and coworkers.<sup>24</sup> Meanwhile, this peak is hardly seen also for  $x = 0.5$  contrary to their report, suggesting that the critical composition for the phase transformation would depend on the synthesis condition. It is likely that the L/R-chain ordering would play a negligible role in the oxygen intake/release characteristics, and we do not discuss its influence.

(4) Plots of the orthorhombic  $a$ -,  $b$ -, and  $c$ -axis lengths for  $\text{Ca}_2\text{Al}_{1-x}\text{Ga}_x\text{MnO}_{5+\delta}$  with respect to the Ga content ( $x$ ).

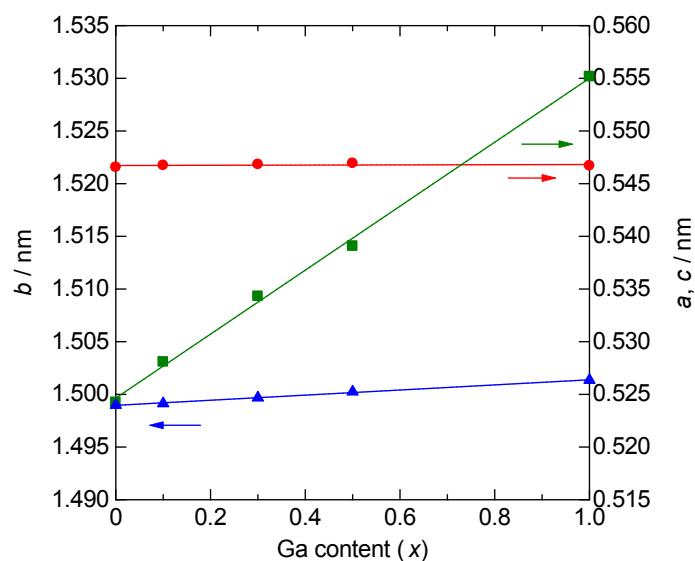

Fig. S4. The orthorhombic  $a$ -,  $b$ -, and  $c$ -axis lengths for the as-synthesized  $\text{Ca}_2\text{Al}_{1-x}\text{Ga}_x\text{MnO}_{5+\delta}$  with respect to the Ga content ( $x$ ).

(5) SEM images of the  $\text{Ca}_2\text{Al}_{1-x}\text{Ga}_x\text{MnO}_{5+\delta}$  products.

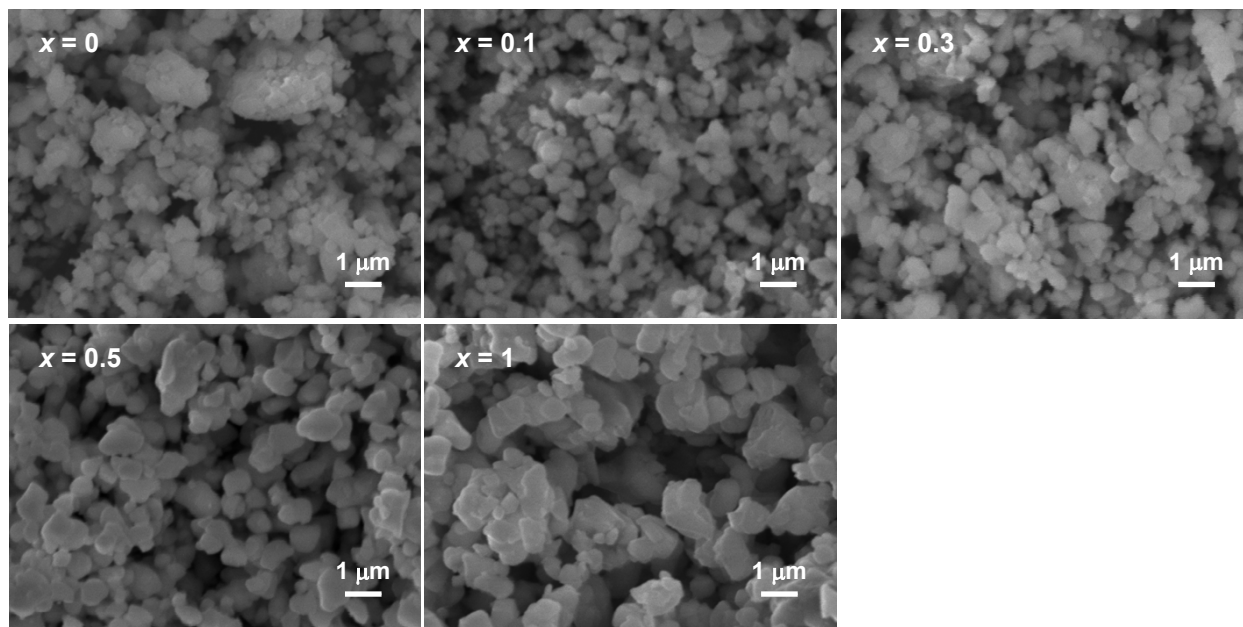

Fig. S5. SEM images of the  $\text{Ca}_2\text{Al}_{1-x}\text{Ga}_x\text{MnO}_{5+\delta}$  products: upper left,  $x = 0$ ; upper middle,  $x = 0.1$ ; upper right,  $x = 0.3$ ; lower left,  $x = 0.5$ ; lower middle,  $x = 1$ .

(6) XRD patterns for the oxygenated  $\text{Ca}_2\text{Al}_{1-x}\text{Ga}_x\text{MnO}_{5+\delta}$  products.

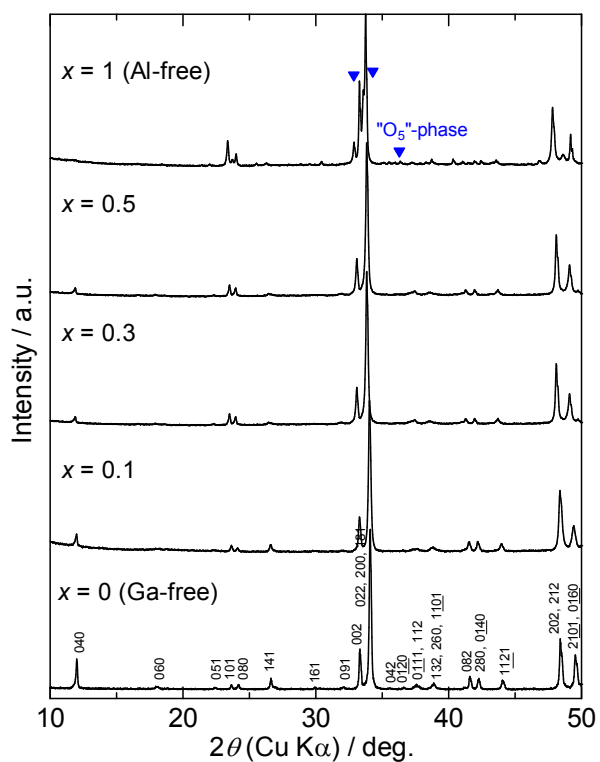

Fig. S6. X-ray powder diffraction patterns for the oxygenated  $\text{Ca}_2\text{Al}_{1-x}\text{Ga}_x\text{MnO}_{5+\delta}$  products with  $x = 0, 0.1, 0.3, 0.5,$  and  $1$ . For  $x = 1$ , diffraction peaks of the oxygen-stoichiometric "O<sub>5</sub>" phase are marked with blue triangles.
